# Supplementary material for: Silsesquioxane-based and triptycene-linked nanoporous polymers (STNPs) with a high surface area for CO2 uptake and efficient dye removal applications
Source: Royal Society of Chemistry journal article supplement (doi:10.1039/d0ma00672f), 2020-01-01
Supplement: d0ma00672f1.pdf [file d0ma00672f1.pdf]

**Supporting Information**

**Silsesquioxane-based and Triptycene-linked Nanoporous Polymers (STNPs) with High Surface Area for CO<sub>2</sub> Uptake and Efficient Dye Removal Applications**

Akhtar Alam, Atikur Hassan, Ranajit Bera and Neeladri Das\*

Department of Chemistry, Indian Institute of Technology Patna, Patna 801106, Bihar, India

E-mail: neeladri@iitp.ac.in, neeladri2002@yahoo.co.in; Tel.: +91 9631624708

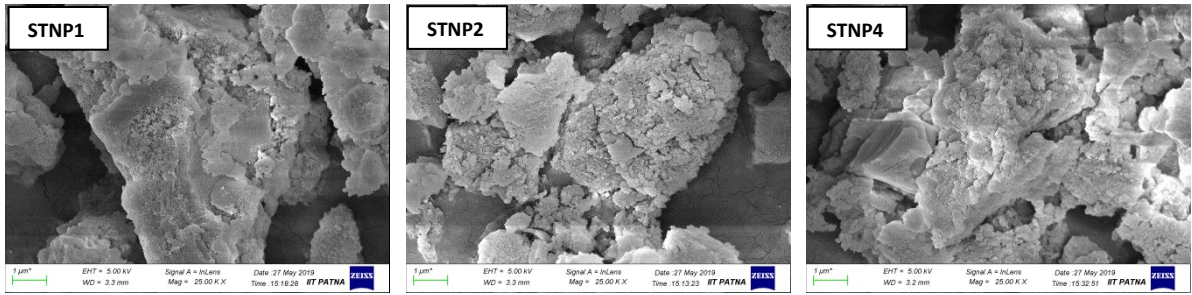

Figure S1. FESEM image of STNP1, STNP2 and STNP4

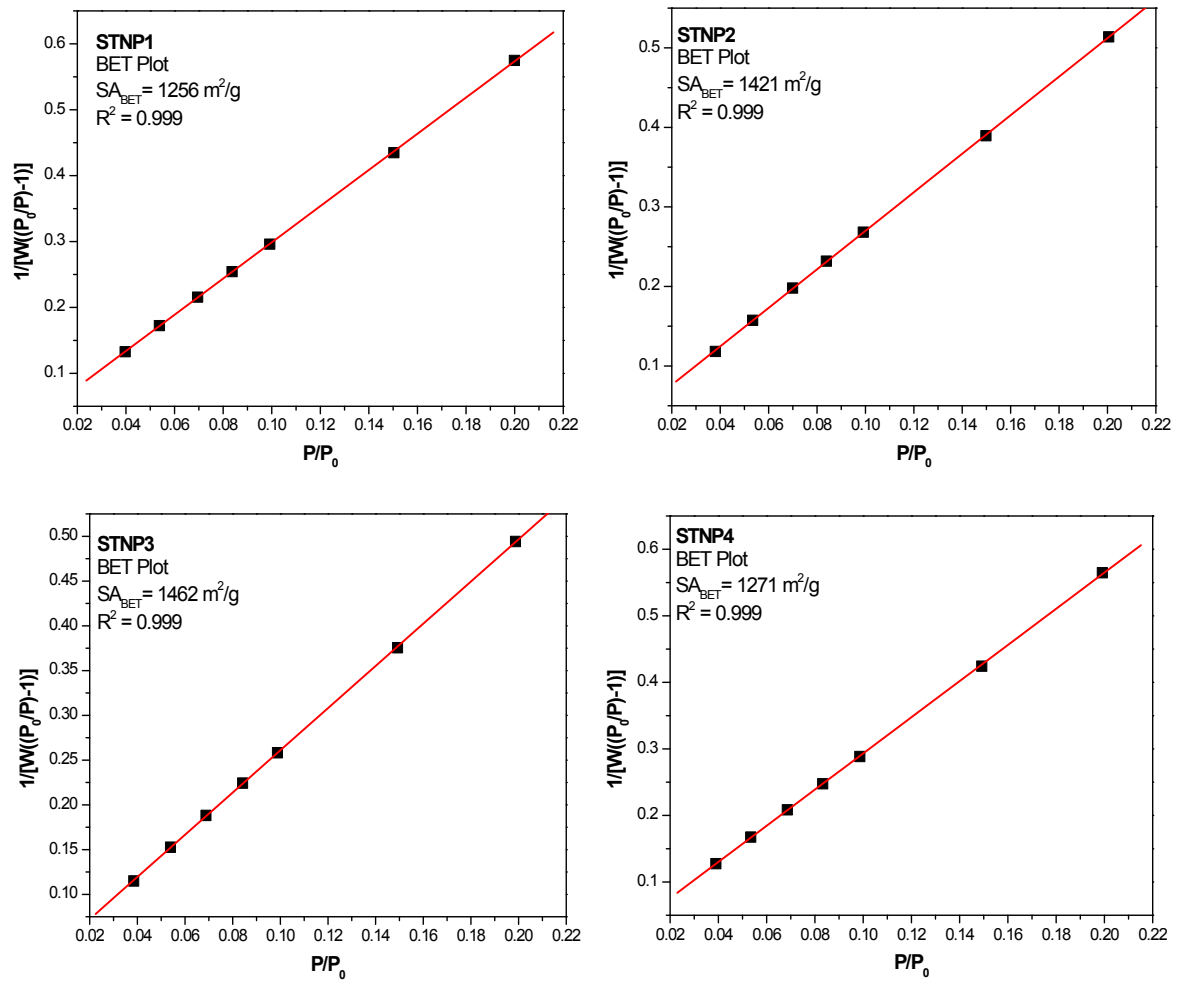

Figure S2. BET plot of STNPs

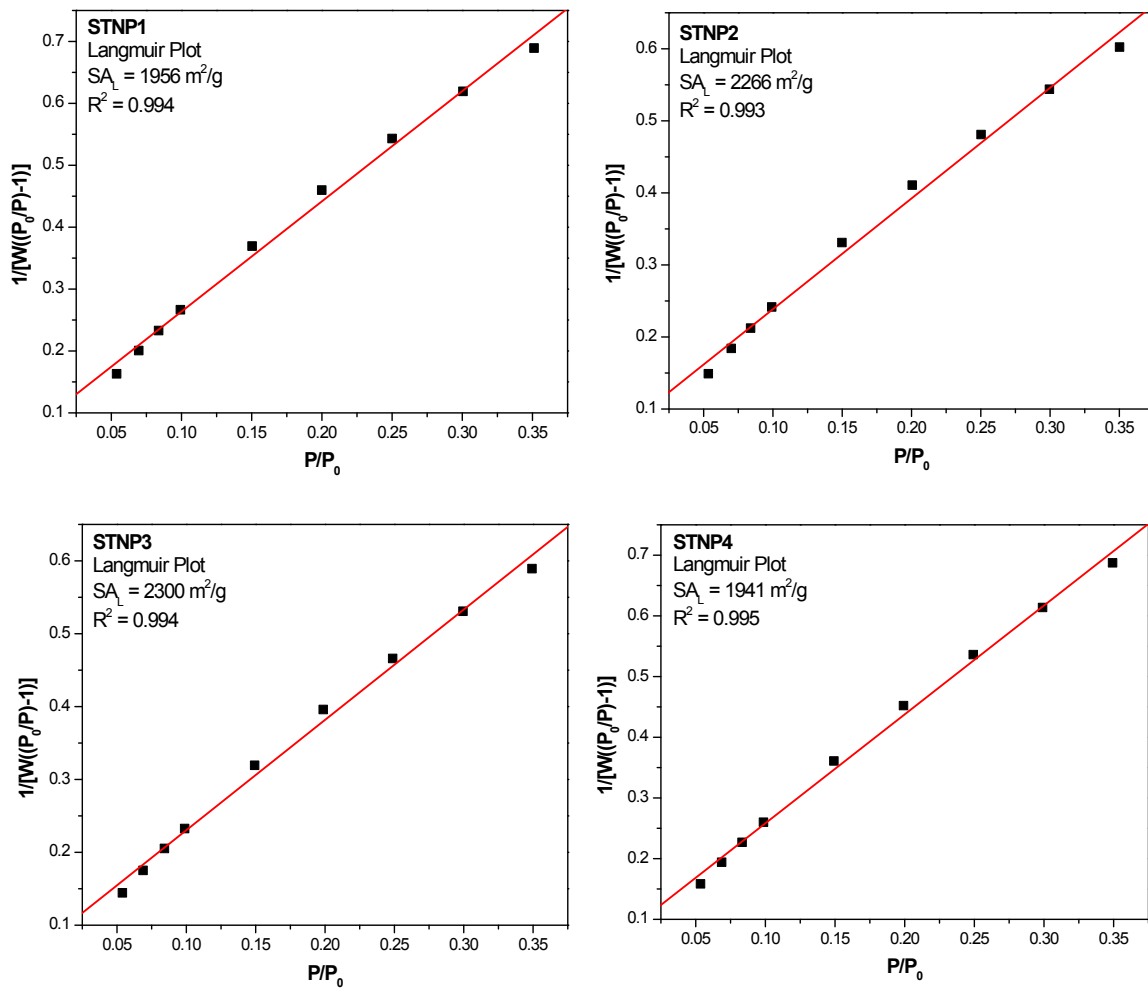

Figure S3. Langmuir plot of STNPs

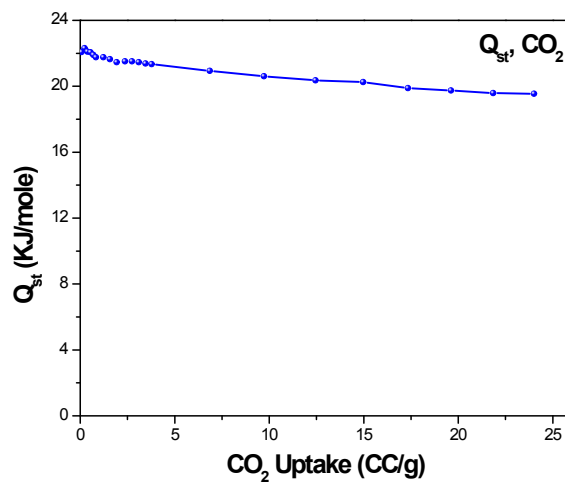

Figure S4.  $Q_{st}$  for  $\text{CO}_2$  capture by STNP3

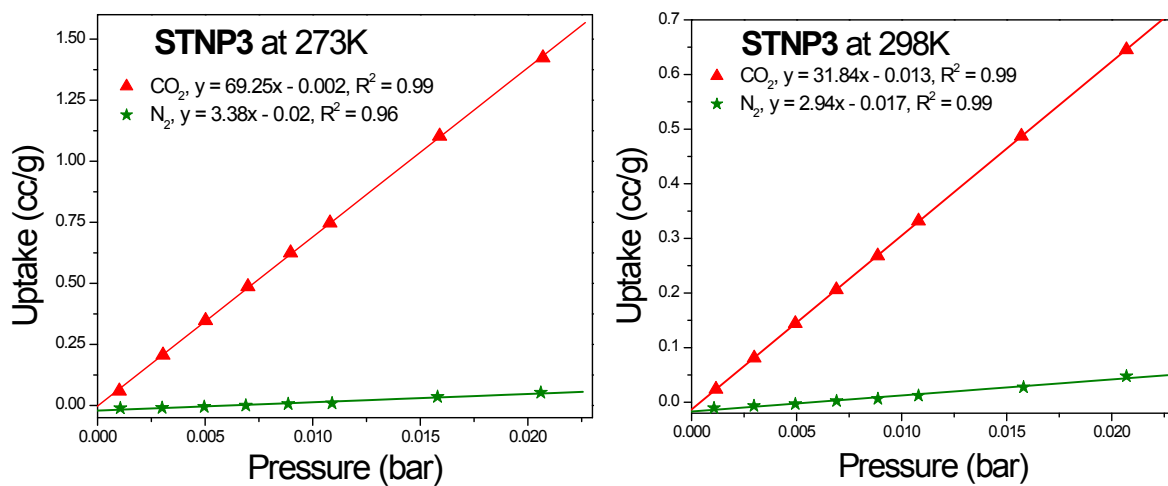

**Figure S5.** Initial gas uptake slopes of STNP3

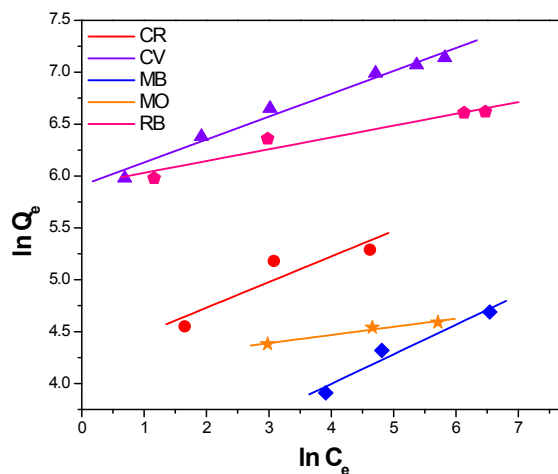

**Figure S6.** Linear fitting of the equilibrium data by using the Freundlich equation

**Table S1** Physical and chemical properties of dyes

| Dyes | Molecular structure | Molecular size (nm) | Molecular weight (g mol <sup>-1</sup> ) | Nature (anionic/cationic) | Absorption wavelength (nm) |
|------|---------------------|---------------------|-----------------------------------------|---------------------------|----------------------------|
| CR   |                     | 2.62*0.74*0.43      | 696                                     | anionic                   | 497                        |

|    |                                                                                   |                |     |          |     |
|----|-----------------------------------------------------------------------------------|----------------|-----|----------|-----|
| CV | 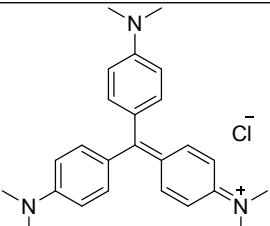 | 1.41*1.21*0.18 | 407 | cationic | 584 |
| MB |  | 1.26*0.77*0.65 | 320 | cationic | 665 |
| MO |  | 1.31*0.55*0.18 | 327 | anionic  | 464 |
| RB |  | 1.59*1.18*0.56 | 478 | cationic | 554 |

**Table S2.** Comparison of adsorbents of removal of CV and RB

| Adsorbate | Adsorbent                                                    | Adsorption capacity (mg g <sup>-1</sup> ) | Reference        |
|-----------|--------------------------------------------------------------|-------------------------------------------|------------------|
| CV        | Magnetic nanocomposite                                       | 112                                       | 1                |
|           | ZSM-5 zeolite                                                | 142                                       | 2                |
|           | multiwalled carbon nanotubes (MWCNTs)                        | 228                                       | 3                |
|           | silsesquioxane-based tetraphenylethene-linked polymers       | 862                                       | 4                |
|           | ferrocene-functionalized silsesquioxane-based polymer        | 1083                                      | 5                |
|           | <b>STNP3</b>                                                 | <b>1428</b>                               | <b>This work</b> |
| RB        | Magnetic mesoporous silica                                   | 105                                       | 6                |
|           | Fe <sub>3</sub> O <sub>4</sub> @POSS-SH                      | 142                                       | 7                |
|           | fluorine-containing silsesquioxane-based hybrid polymers     | 416                                       | 8                |
|           | porous organic copolymer based on triptycene and crown ether | 422                                       | 9                |

|  |                                              |             |                  |
|--|----------------------------------------------|-------------|------------------|
|  | MPSC/C                                       | 785         | 10               |
|  | hybrid phosphorus-containing porous polymers | 828         | 11               |
|  | <b>STNP3</b>                                 | <b>1000</b> | <b>This work</b> |

## References

1. K. P. Singh, S. Gupta, A. K. Singh and S. Sinha, *J. Hazard. Mater.*, 2011, **186**, 1462-1473.
2. G. V. Brião, S. L. Jahn, E. L. Foletto and G. L. Dotto, *J. Colloid Interface Sci.*, 2017, **508**, 313-322.
3. W. Liu, X. Jiang and X. Chen, *J. Solid State Chem.*, 2015, **229**, 342-349.
4. H. Liu and H. Liu, *J. Mater. Chem. A*, 2017, **5**, 9156-9162.
5. X. Yang and H. Liu, *Chem. Eur. J.*, 2018, **24**, 13504-13511.
6. S. Tao, Z. Zhu, C. Meng and C. Wang, *Microporous Mesoporous Mater.*, 2013, **171**, 94-102.
7. H.-B. He, B. Li, J.-P. Dong, Y.-Y. Lei, T.-L. Wang, Q.-W. Yu, Y.-Q. Feng and Y.-B. Sun, *ACS Appl. Mater. Interfaces*, 2013, **5**, 8058-8066.
8. M. Ge and H. Liu, *Chem. Eur. J.*, 2018, **24**, 2224-2231.
9. T. Xu, Y. He, Y. Qin, C. Zhao, C. Peng, J. Hu and H. Liu, *RSC Adv.*, 2018, **8**, 4963-4968.
10. X. Zhuang, Y. Wan, C. Feng, Y. Shen and D. Zhao, *Chem. Mater.*, 2009, **21**, 706-716.
11. R. Shen and H. Liu, *RSC Adv.*, 2016, **6**, 37731-37739.
